# Supplementary material for: Short-Term Effect of Induced Alterations in Testosterone Levels on Fasting Plasma Amino Acid Levels in Healthy Young Men
Source: MDPI journal article supplement (doi:10.3390/life11111276), 2021-11-22
Supplement: s1 [file s1]

Results from stepwise-binomial logistic regression (method: backward) and Bootstrap resampling with replacement method.

The model with the best results in the analysis included amino acids tyrosine and phenylalanine.

```
> library(MASS)
> mod_step <- stepAIC(mod1, direction = "backward", trace = F)
> mod_step

Call:  glm(formula = Time_point ~ Tyr + Phe, family = "binomial", data =
data2)
```

```
Coefficients:
(Intercept)          Tyr          Phe
    -95.398         3.444        12.763
```

```
Degrees of Freedom: 85 Total (i.e. Null);  83 Residual
Null Deviance:      109.9
Residual Deviance: 44.06      AIC: 50.06
```

```
> library(bootStepAIC)
> mod_boot <- boot.stepAIC(mod1, data = data2, B=50)
There were 50 or more warnings (use warnings() to see the first 50)
> mod_boot
```

Summary of Bootstrapping the 'stepAIC()' procedure for

```
Call:
glm(formula = Time_point ~ ., family = "binomial", data = data2)
```

```
Bootstrap samples: 50
Direction: backward
Penalty: 2 * df
```

Covariates selected

```
(%)
Tyr  86
Phe  82
His  46
Lys  46
Trp  42
Met  34
Leu  26
Val  24
Asn  18
```

Coefficients Sign

```
+ (%)  - (%)
Phe 100.00  0.00
Tyr 100.00  0.00
Lys  95.65  4.35
Asn  77.78 22.22
Trp  71.43 28.57
Leu  46.15 53.85
Val  41.67 58.33
Met  29.41 70.59
His   0.00 100.00
```

Stat Significance  
(%)

Phe 68.29  
Tyr 51.16  
Trp 42.86  
Met 41.18  
Asn 33.33  
Lys 30.43  
Val 25.00  
His 21.74  
Leu 7.69

The stepAIC() for the original data-set gave

Call: glm(formula = Time\_point ~ Tyr + Phe, family = "binomial", data = data2)

Coefficients:

|             |       |        |
|-------------|-------|--------|
| (Intercept) | Tyr   | Phe    |
| -95.398     | 3.444 | 12.763 |

Degrees of Freedom: 85 Total (i.e. Null); 83 Residual

Null Deviance: 109.9

Residual Deviance: 44.06 AIC: 50.06

Stepwise Model Path

Analysis of Deviance Table

Initial Model:

Time\_point ~ Asn + Val + Met + Leu + Tyr + Phe + Lys + His +  
Trp

Final Model:

Time\_point ~ Tyr + Phe

|         | Step | Df         | Deviance | Resid. | Df | Resid. Dev | AIC      |
|---------|------|------------|----------|--------|----|------------|----------|
| 1       |      |            |          |        | 76 | 39.96552   | 59.96552 |
| 2 - Leu | 1    | 0.02320367 |          |        | 77 | 39.98872   | 57.98872 |
| 3 - Met | 1    | 0.02213946 |          |        | 78 | 40.01086   | 56.01086 |
| 4 - Asn | 1    | 0.06069513 |          |        | 79 | 40.07156   | 54.07156 |
| 5 - Val | 1    | 0.10460726 |          |        | 80 | 40.17617   | 52.17617 |
| 6 - Trp | 1    | 0.91316813 |          |        | 81 | 41.08933   | 51.08933 |
| 7 - Lys | 1    | 1.60707345 |          |        | 82 | 42.69641   | 50.69641 |
| 8 - His | 1    | 1.36787326 |          |        | 83 | 44.06428   | 50.06428 |
