# Supplementary material for: Short-Term Effect of Induced Alterations in Testosterone Levels on Fasting Plasma Amino Acid Levels in Healthy Young Men
Source: Life (Basel). 2021 Nov 22;11(11):1276. doi: 10.3390/life11111276 (PMC8619397; doi:10.3390/life11111276)
Supplement: Supplementary file 1 [file life-11-01276-s001.zip › SahlinKB_supplementary/Table S1. Low, high, SD and CI.xlsx]

## Sheet: Sheet1
	Time point A: Baseline				Time point B: Low Testosterone				Time point C: Restored Testosterone
Amino acid	Lowest Level	Highest Level	Standard Deviation	Confidence Interval	Lowest Level	Highest Level	Standard Deviation	Confidence Interval	Lowest Level	Highest Level	Standard Deviation	Confidence Interval
Methionine	16.5	28.2	2.67879	(22.85 - 24.88)	21.2	67.8	8.381	(25.67 - 32.04)	13.5	178.8	29.6693	(14.15 - 36.72)
Histidine	62.4	96.5	8.16698	(74.83 - 81.04)	60.1	119	11.5934	(80.4 - 89.22)	49.5	89.8	8.53447	(64.42 - 70.92)
Lysine	124.8	209.8	20.5867	(156.96 - 172.62)	143.7	348.4	37.1292	(183.66 - 211.91)	89.8	191.4	22.9732	(134.94 - 152.42)
Tryptophan	44.4	78.7	8.58657	(60.94 - 67.47)	57.6	129.5	14.909	(68.78 - 80.12)	38.3	84.7	10.1722	(55.07 - 62.81)
Asparagine	35.4	71	7.51149	(46.16 - 51.88)	37.3	81.6	10.5707	(49.47 - 57.51)	31.6	65.7	7.51209	(42.56 - 48.27)
Phenylalanine	48.1	69.2	4.33578	(51.5 - 54.8)	50.6	106.8	9.82953	(59.86 - 67.34)	35.3	56.9	5.1189	(41.63 - 45.53)
Valine	178.8	294.6	23.3297	(223.55 - 241.3)	210.3	630.8	73.6169	(239.29 - 295.29)	25.2	319.5	55.3304	(188.93 - 231.03)
Tyrosine	43.9	72.4	7.24738	(56.68 - 62.19)	57.8	131.6	14.5968	(70.42 - 81.52)	38.8	90.7	11.696	(46.06 - 54.96)
Leucine	110	146.4	9.8685	(123.55 - 131.06)	119.2	464.3	60.8816	(131.03 - 177.35)	88.3	160.1	19.5744	(107.54 - 122.44)
Taurine	24.3	62.1	7.68535	(38.29 - 44.13)	26.8	72.3	9.75977	(39.5 - 46.92)	32.9	78.4	8.76301	(45.81 - 52.47)
Aspartate	3.6	10.4	1.64276	(4.24 - 5.49)	3.3	7.5	0.902419	(4.19 - 4.87)	3.7	7	0.770468	(4.69 - 5.28)
Threonine	102	166.5	15.1563	(118.08 - 129.61)	90.9	201.8	27.5529	(121.87 - 142.84)	84.1	184.9	23.4115	(111.54 - 129.35)
Serine	79.4	140	13.9744	(105.28 - 115.91)	90.9	168.9	18.697	(109.38 - 123.6)	75.4	133.6	14.9427	(100.5 - 111.86)
Glutamine	10.6	63.4	16.7036	(27.62 - 40.33)	11.3	50	12.5354	(27.28 - 36.82)	19.7	81.4	16.2527	(41.35 - 53.72)
Glycine	174.1	412.4	55.4388	(213.71 - 255.89)	148.9	338.5	49.652	(206.67 - 244.44)	182.1	390.5	41.8139	(227.28 - 259.09)
Alanine	220.8	584.5	78.1463	(319.93 - 379.38)	235.6	510.7	79.0064	(328.52 - 388.62)	210.8	576.5	79.4434	(313.54 - 373.97)
Citrulline	14.7	38.5	5.59139	(25.2 - 29.46)	18.9	46.9	6.39757	(25.86 - 30.73)	17.8	46.5	7.0821	(26.88 - 32.27)
α-aminobutyrate	7	30.5	5.72591	(15.36 - 19.72)	4.7	34.8	5.93663	(15.95 - 20.47)	5.8	354.6	63.0735	(3.97 - 51.96)
Cysteine	39.1	55.4	4.98429	(44.58 - 48.38)	23	57.9	6.64056	(43.47 - 48.52)	10.1	56.5	8.2373	(43.46 - 49.72)
Isoleucine	59	88.2	7.31904	(66.36 - 71.92)	1.4	233.5	34.0484	(61.87 - 87.78)	55.2	102.7	11.5694	(66.01 - 74.81)
Ornithine	50.8	110.7	16.3549	(68.67 - 81.11)	56.4	118.7	14.1776	(73.33 - 84.12)	55.2	97.7	10.829	(73.18 - 81.42)
3-methylhistidine	2.2	6.8	1.15561	(4.13 - 5.01)	2.5	7.5	1.17789	(3.64 - 4.54)	2.7	6	0.821238	(3.63 - 4.26)
Arginine	27.3	88.6	14.9868	(56.34 - 67.74)	36.7	94.8	15.3099	(58.44 - 70.09)	37.5	110.7	14.7553	(51.95 - 63.17)
