# Supplementary material for: Short-Term Effect of Induced Alterations in Testosterone Levels on Fasting Plasma Amino Acid Levels in Healthy Young Men
Source: Life (Basel). 2021 Nov 22;11(11):1276. doi: 10.3390/life11111276 (PMC8619397; doi:10.3390/life11111276)
Supplement: Supplementary file 1 [file life-11-01276-s001.zip › SahlinKB_supplementary/Table S2. All statistical results 21-10-23.xlsx]

## Sheet: Sheet1
			MEAN			Overall differences					Post-hoc("fdr") (t.test or Wilcoxon paired)						Mean/median and Coef.Interval (CI) of the differences			Normality test Shapiro-Wilk
Analyte	Type	number samples	A	B	C	ANOVA/Friedman (pv<.05)	ANOVA/Friedman (p.value)	q.value(FDR)	FDRsig	test name	pairwise adj p-value (B-A)	pairwise adj p-value (C-B)	pairwise adj p-value (C-A)	pairwise Signif. (B-A)	pairwise Signif. (B-C)	pairwise Signif. (C-A)	CI.Diff (B-A)	CI.Diff (C-B)	CI.Diff (C-A)	A (p-value)	B (p-value)	C (p-value)	normality
T	CC	29	19.969	0.706897	37.3897	2.8264e-26	*	9.8924e-25	***	ANOVA	1.34468e-16	1.34468e-16	8.47986e-09	***	***	***	-19.262 (-21.45; -17.075)	36.683 (32.451; 40.914)	17.421 (13.004; 21.837)	0.304014	0.58304	0.111815	norm
Phe	AA	29	5.72765	5.97756	5.43653	2.96553e-11	*	4.615e-10	***	Friedman	3.98395e-05	9.00913e-06	1.26204e-05	***	***	***	0.249 (0.196; 0.303)	-0.547 (-0.623; -0.473)	-0.291 (-0.363; -0.223)	0.00451713	0.000206016	0.0551364	not-norm
Tyr	AA	29	5.88244	6.22526	5.6278	4.97437e-11	*	4.97437e-10	***	Friedman	8.10711e-06	2.29171e-05	0.000183425	***	***	***	0.286 (0.211; 0.413)	-0.615 (-0.737; -0.492)	-0.281 (-0.393; -0.18)	0.340144	0.0305403	0.00361446	not-norm
Lys	AA	29	7.35334	7.60725	7.14796	1.0788e-08	*	8.09103e-08	***	Friedman	6.56088e-05	1.23299e-05	0.00101359	***	***	**	0.245 (0.171; 0.319)	-0.431 (-0.567; -0.335)	-0.214 (-0.31; -0.097)	0.613823	0.0130353	0.47579	not-norm
Leu	AA	28	6.98797	7.221	6.80847	2.38237e-07	*	1.42942e-06	***	Friedman	0.000116815	2.2968e-05	0.0012723	***	***	**	0.191 (0.136; 0.24)	-0.376 (-0.508; -0.264)	-0.191 (-0.286; -0.086)	0.606558	2.26476e-08	0.0710421	not-norm
Met	AA	29	4.56729	4.81153	4.40929	9.22156e-07	*	4.61078e-06	***	Friedman	0.000355457	0.000298047	0.00510573	***	***	**	0.215 (0.123; 0.314)	-0.448 (-0.589; -0.321)	-0.253 (-0.379; -0.082)	0.0080785	6.3553e-05	1.874e-08	not-norm
His	AA	29	6.27676	6.39338	6.06931	3.07667e-11	*	4.615e-10	***	ANOVA	0.004975	2.06366e-08	2.22434e-06	**	***	***	0.117 (0.038; 0.195)	-0.324 (-0.405; -0.243)	-0.207 (-0.277; -0.138)	0.348858	0.896466	0.761507	norm
Val	AA	29	7.8536	8.0299	7.62645	4.38611e-05	*	0.000146204	***	Friedman	0.00120521	0.00042424	0.0379099	**	***	*	0.159 (0.073; 0.23)	-0.323 (-0.47; -0.187)	-0.146 (-0.278; -0.015)	0.893752	3.2852e-07	8.84071e-08	not-norm
Trp	AA	29	5.99143	6.19444	5.86041	9.29339e-06	*	3.98288e-05	***	Friedman	0.000386795	2.52409e-05	0.0289664	***	***	*	0.205 (0.117; 0.302)	-0.338 (-0.423; -0.226)	-0.129 (-0.238; -0.017)	0.182834	0.0288319	0.999354	not-norm
Asn	AA	29	5.59941	5.71617	5.4871	0.000110546	*	0.000301489	***	ANOVA	0.0315782	0.000645215	0.0178339	*	***	*	0.117 (0.011; 0.222)	-0.229 (-0.34; -0.119)	-0.112 (-0.198; -0.027)	0.944471	0.29166	0.602423	norm
Glu	AA	29	4.89845	4.87172	5.4814	0.00194717	*	0.0041725	**	Friedman	0.665404	0.000227647	0.00042071		***	***	-0.05 (-0.333; 0.271)	0.505 (0.268; 0.896)	0.616 (0.319; 0.862)	0.0960841	0.0090867	0.332953	not-norm
Ile	AA	28	6.104	6.0198	6.10668	0.173774		0.217217		Friedman	0.389496	0.389496	0.927422				0.057 (-0.027; 0.122)	-0.048 (-0.162; 0.051)	0.007 (-0.083; 0.073)	0.0787418	1.31553e-09	0.00132494	not-norm
Ser	AA	29	6.77778	6.84729	6.71611	0.00194717	*	0.0041725	**	Friedman	0.119501	0.0129411	0.0434496		*	*	0.055 (-0.009; 0.117)	-0.106 (-0.193; -0.044)	-0.07 (-0.126; -0.007)	0.656338	0.0343559	0.549028	not-norm
Thr	AA	29	6.94241	7.02023	6.88807	0.0944652		0.149156		ANOVA	0.195863	0.189919	0.371978				0.078 (-0.025; 0.18)	-0.132 (-0.272; 0.008)	-0.054 (-0.177; 0.068)	0.456789	0.410311	0.291108	norm
Asp	AA	29	2.22616	2.1546	2.30114	0.0131237	*	0.024607	*	Friedman	0.432094	0.0386758	0.120429		*		-0.072 (-0.243; 0.11)	0.139 (0.035; 0.259)	0.182 (-0.02; 0.283)	0.00013716	0.394077	0.351651	not-norm
Arg	AA	29	5.90769	5.96609	5.80697	0.012534	*	0.024607	*	Friedman	0.665404	0.154932	0.239805				0.041 (-0.134; 0.219)	-0.186 (-0.326; 0.004)	-0.117 (-0.281; 0.055)	0.0229131	0.480446	0.29874	not-norm
Taur	AA	29	5.34144	5.39848	5.59771	5.93239e-05	*	0.000177972	***	ANOVA	0.414497	0.0015089	2.36417e-06		**	***	0.057 (-0.084; 0.198)	0.199 (0.088; 0.31)	0.256 (0.173; 0.339)	0.138874	0.858535	0.444473	norm
Gly	AA	29	7.84274	7.78346	7.90776	0.113902		0.170854		Friedman	0.251783	0.0491617	0.0855918		*		-0.059 (-0.164; 0.04)	0.124 (0.028; 0.223)	0.073 (-0.002; 0.141)	0.00923536	0.7289	0.060372	not-norm
Ala	AA	29	8.41718	8.45105	8.38961	0.709924		0.709924		ANOVA	0.704302	0.704302	0.704302				0.034 (-0.112; 0.179)	-0.061 (-0.224; 0.101)	-0.028 (-0.175; 0.12)	0.72565	0.222338	0.982717	norm
Aaba	AA	29	4.05389	4.10147	4.08758	0.227011		0.272413		Friedman	0.778632	0.562981	0.562981				0.045 (-0.195; 0.31)	-0.119 (-0.42; 0.18)	-0.123 (-0.319; 0.081)	0.694267	0.0101259	2.81819e-06	not-norm
3-Mhis	AA	21	2.14425	1.98477	1.9773	0.166672		0.217217		ANOVA	0.226714	0.94329	0.144596				-0.159 (-0.382; 0.063)	-0.007 (-0.224; 0.209)	-0.167 (-0.332; -0.001)	0.669664	0.761371	0.742731	norm
Orn	AA	29	6.19422	6.27778	6.25817	0.307672		0.355006		ANOVA	0.314351	0.727516	0.314351				0.084 (-0.045; 0.212)	-0.02 (-0.134; 0.095)	0.064 (-0.038; 0.166)	0.513047	0.672305	0.66187	norm
Citr	AA	29	4.74151	4.79197	4.84821	0.0810213		0.135035		Friedman	0.387078	0.387078	0.062449				0.047 (-0.063; 0.156)	0.047 (-0.057; 0.155)	0.111 (0.019; 0.193)	0.366766	0.0276578	0.730674	not-norm
Cys	AA	29	5.53061	5.50584	5.49871	0.0187997	*	0.033176	*	Friedman	0.758528	0.179252	0.0868992				-0.013 (-0.083; 0.068)	0.063 (-0.018; 0.126)	0.055 (0.003; 0.098)	0.0844417	5.52948e-05	2.51539e-09	not-norm
Table S2. All statistical results from the amino acids and testosterone (T) across the time points A) baseline, B) low T and C) restored T. Level of significance: * p<0.05, **p<0.01, ***p<0.001
